# Supplementary material
Source: ML conference proceedings conference paper supplement (https://proceedings.neurips.cc/paper_files/paper/2023/hash/435e8fbbfc2c6072d4f3a5cb6e56a39a-Abstract.html)
Supplement: Supplementary file 1 [file 435e8fbbfc2c6072d4f3a5cb6e56a39a-Supplemental-Conference.pdf]

## A Appendix

### A.1 Message Passing in SyncTREE

As the message passing process in Figure 8, information from leaves, sub-branches, and the whole global structure is first collected following the bottom-up propagation by  $GAT_{bu}$ . Then, the final node representations of  $GAT_{bu}$  are applied to each layer of  $GAT_{td}$  to jointly update the node attributes of the corresponding top-down tree with the node embeddings of its previous layer. As the example shown in Figure 8, by designing this two-pass message-passing mechanism, the node features will incorporate the information from different levels and become more expressive. Furthermore, in the top-down tree, the root node can only be updated with synchronized  $h_{bu}^L$  since it doesn't have any incoming connection, it ensures that information injection at the source of the top-down tree is fixed which can help to maintain differentiable feature embeddings without over-smoothing.

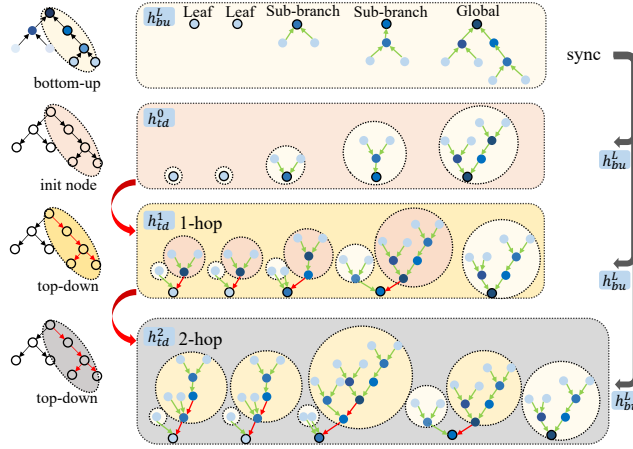

Figure 8: Illustration of our two-pass message-passing mechanism.

### A.2 Synthetic and RISC-V Dataset Preparation

Our dataset is composed of artificially generated and practical RC trees and the golden timing results at sinks (leaf nodes of each RC tree) obtained by SPICE simulation. On the one hand, we follow the pipeline in Figure 9 to generate the synthetic dataset. To be specific, we first adopt Algorithm 1 to generate RC-trees with random typologies and then convert them to artificial IC interconnects for further SPICE timing measurement. On the other hand, we directly extract RC trees from practical RISC-V circuit designs to compose the RISC-V dataset. The statistics of both datasets are shown in Figure 10 and Figure 11.

---

#### Algorithm 1 Generate artificial RC-trees

---

**Require:**  $v_d \in [v_{min}, v_{max}]$ ,  $R \in [R_{min}, R_{max}]$ ,  $C \in [C_{min}, C_{max}]$   
Initialize voltage  $v_d$  of driving cell, edge type (rising or falling), depth  $D$  of RC tree  
 $parent\ set = list[drivingcell]$   
 $parent \leftarrow$  randomly pick one element from  $parent\ set$   
**while**  $depth \leq D$  **do**  
    randomly choose  $R, C$   
    generate  $child$ , add  $child$  into  $parent\ set$   
    the  $R_{child}$  of the edge from  $child$  to the  $parent \leftarrow R$   
    the  $C_{child}$  of  $child$  to the ground  $\leftarrow C$   
     $parent \leftarrow$  randomly pick one element from  $parent\ set$   
     $D = D + 1$   
**end while**

---

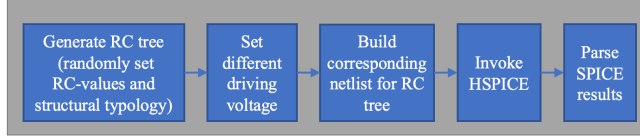

Figure 9: Pipeline for the synthetic dataset generation.

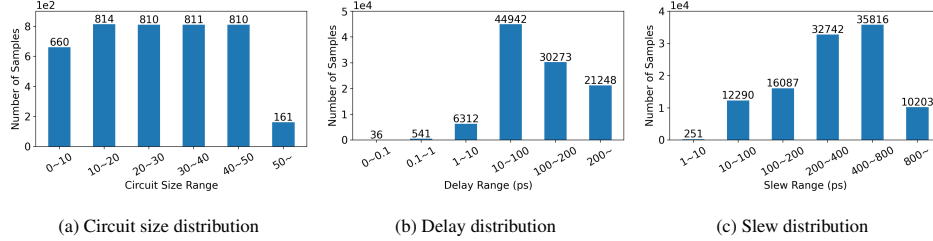

Figure 10: Synthetic dataset statistics.

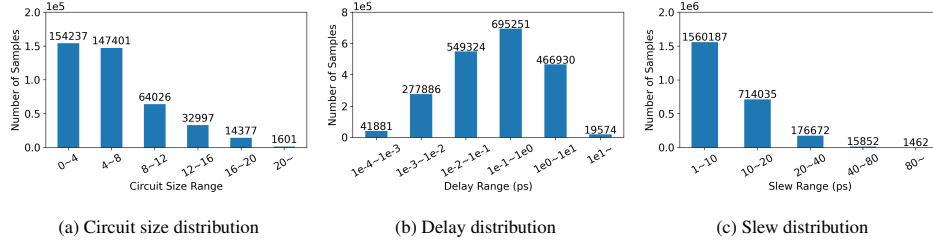

Figure 11: RISC-V dataset statistics.

### 418 A.3 Baselines's Implementation

419 The GNNs of all the baseline models are set with 32/128 hidden dimensions separately for the  
 420 synthetic dataset/RISC-V dataset. For GraphTrans, the dimension of the feedforward full-connection  
 421 layers in the Transformer of GraphTrans is set to 256 with 0.1 dropout probability between layers, the  
 422 number of attention heads is set to 4, and the max input sequence length is set to the maximum circuit  
 423 size. It should be noted that we only made a little modification to the GraphTrans model. GraphTrans  
 424 is originally designed for node classification tasks, it takes CLS token from Transformer output as the  
 425 representation of the whole graph and applies a linear module followed by softmax to implement  
 426 prediction. In order to incorporate global information into node features, in our experiments, we  
 427 concatenate the CLS token with node embeddings and then feed it into MLP to get the final output.  
 428 For NTREE, we set GAT as its basic block with a 0.2 dropout probability between layers. We follow  
 429 the original junction-tree-based algorithm in [10] to compose H-trees from our RC circuits with the  
 430 same radius setting for extracting subgraphs in the paper.

### 431 A.4 Analysis of TContrast Loss

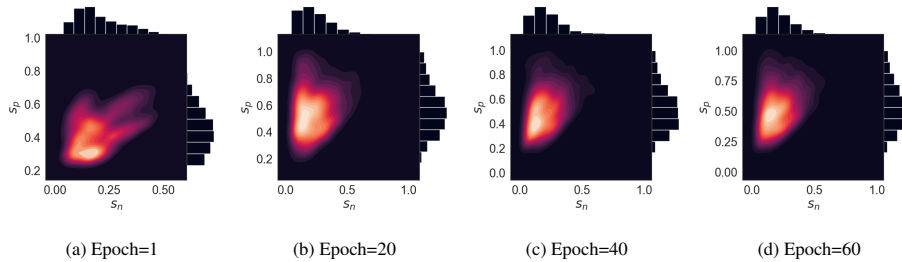

Figure 12: The distribution of similarity pairs with training epochs.

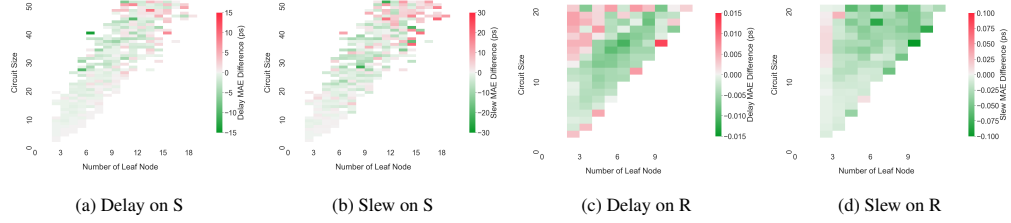

Figure 13: Mean Average Error difference after applying TContrast loss on the synthetic dataset (S) and RISC-V dataset (R). (Negative values indicate that TC-loss-guided SyncTREE has a lower MAE error than vanilla SyncTREE)

432 To visualize the converging process during training, we plot the distribution of similarity pairs in  
 433 space at different epochs in Figure 12. It obviously shows that our model approaches the optimization  
 434 goal with a more concentrated similarity distribution after enough training with the guidance of  
 435 TContrast loss. In Figure 13, we show the MAE difference of timing results obtained by vanilla  
 436 SyncTREE and TC-loss guided SyncTREE. As shown in the results, after being combined with TC  
 437 loss, our SyncTREE model has smaller errors for most types of RC trees which can effectively prove  
 438 the validity of TC loss.
